# Supplementary material for: Multiple Functional Brain Networks Related to Pain Perception Revealed by fMRI
Source: PubMed Central journal article supplement (PMC9537130; doi:10.1007/s12021-021-09527-6), 2021-06-08
Supplement: 12021_2021_9527_MOESM2_ESM.pdf [file 12021_2021_9527_MOESM2_ESM.pdf]

Supplementary Table 1

*Anatomical Descriptions for the Top 10% of Component 1 Loadings*

| Brain Regions (Harvard-Oxford Atlas)                       | Cluster Volume (mm <sup>3</sup> ) | Brodmann's Area for Peak Location | MNI Coordinates for Peak Locations |     |     | Component Loading |        |
|------------------------------------------------------------|-----------------------------------|-----------------------------------|------------------------------------|-----|-----|-------------------|--------|
|                                                            |                                   |                                   | x                                  | y   | z   |                   |        |
| positive loadings                                          |                                   |                                   |                                    |     |     |                   |        |
| <i>cluster 1: bilateral</i>                                | 211356                            |                                   |                                    |     |     |                   |        |
| cerebellum (lobule VI)                                     |                                   |                                   | 37                                 | 21  | -52 | -22               | 0.3271 |
| occipital fusiform gyrus / cerebellum crus 1               |                                   |                                   | 19                                 | -45 | -67 | -19               | 0.3121 |
| lateral occipital cortex, inferior division                |                                   |                                   | 19                                 | -39 | -79 | -16               | 0.307  |
| precentral gyrus                                           |                                   |                                   | 6                                  | -42 | -13 | 56                | 0.3031 |
| precentral gyrus                                           |                                   |                                   | 4                                  | -36 | -19 | 62                | 0.2985 |
| lateral occipital cortex, superior division                |                                   |                                   | 19                                 | 30  | -73 | 26                | 0.295  |
| occipital fusiform gyrus                                   |                                   |                                   | 19                                 | 45  | -64 | -19               | 0.2945 |
| precuneous cortex                                          |                                   |                                   | 7                                  | 3   | -58 | 62                | 0.2918 |
| precuneous cortex                                          |                                   |                                   | n/a                                | 0   | -52 | 65                | 0.2897 |
| lingual gyrus                                              |                                   |                                   | 18                                 | 6   | -70 | -13               | 0.2876 |
| lateral occipital cortex, superior division                |                                   |                                   | 7                                  | 27  | -61 | 56                | 0.2862 |
| lateral occipital cortex, superior division                |                                   |                                   | 7                                  | 24  | -67 | 53                | 0.2858 |
| postcentral gyrus                                          |                                   |                                   | 4                                  | -51 | -19 | 50                | 0.284  |
| lingual gyrus                                              |                                   |                                   | 18                                 | 9   | -73 | -16               | 0.2837 |
| precentral gyrus                                           |                                   |                                   | 6                                  | -30 | -7  | 65                | 0.2811 |
| precentral gyrus                                           |                                   |                                   | 6                                  | -27 | -22 | 68                | 0.2782 |
| occipital fusiform gyrus                                   |                                   |                                   | 19                                 | 36  | -79 | -16               | 0.2735 |
| lateral occipital cortex, inferior division                |                                   |                                   | 19                                 | 33  | -82 | -13               | 0.2733 |
| postcentral gyrus                                          |                                   |                                   | 4                                  | 0   | -40 | 71                | 0.2719 |
| lateral occipital cortex, inferior division                |                                   |                                   | 19                                 | 36  | -82 | 2                 | 0.2674 |
| lateral occipital cortex, superior division                |                                   |                                   | 19                                 | -30 | -79 | 20                | 0.2651 |
| lateral occipital cortex, superior division                |                                   |                                   | 7                                  | -27 | -61 | 53                | 0.2595 |
| lingual gyrus                                              |                                   |                                   | 17                                 | -6  | -88 | -4                | 0.2576 |
| superior parietal lobule                                   |                                   |                                   | 7                                  | -27 | -55 | 59                | 0.2575 |
| occipital fusiform gyrus                                   |                                   |                                   | 18                                 | 18  | -88 | -13               | 0.2572 |
| intracalcarine cortex                                      |                                   |                                   | 17                                 | 12  | -85 | -1                | 0.257  |
| occipital fusiform gyrus                                   |                                   |                                   | 18                                 | -15 | -85 | -16               | 0.2543 |
| lingual gyrus                                              |                                   |                                   | 17                                 | -3  | -85 | -10               | 0.2516 |
| lateral occipital cortex, superior division                |                                   |                                   | 7                                  | -18 | -64 | 56                | 0.2514 |
| superior parietal lobule                                   |                                   |                                   | n/a                                | -36 | -40 | 59                | 0.2505 |
| lingual gyrus                                              |                                   |                                   | 18                                 | -12 | -88 | -13               | 0.2503 |
| lingual gyrus                                              |                                   |                                   | 18                                 | -9  | -73 | -19               | 0.2346 |
| vermis                                                     |                                   |                                   | n/a                                | 3   | -73 | -37               | 0.2092 |
| juxtapositional lobule cortex (supplementary motor cortex) |                                   |                                   | 6                                  | -3  | -1  | 71                | 0.2091 |
| juxtapositional lobule cortex (supplementary motor cortex) |                                   |                                   | n/a                                | -3  | -7  | 74                | 0.2068 |
| cingulate gyrus, posterior division                        |                                   |                                   | n/a                                | 0   | -43 | 5                 | 0.1791 |
| <i>cluster 2: left hemisphere</i>                          | 1107                              |                                   |                                    |     |     |                   |        |
| juxtapositional lobule cortex (supplementary motor cortex) |                                   |                                   | 24                                 | -3  | 2   | 47                | 0.2201 |
| <i>cluster 3: right hemisphere</i>                         | 864                               |                                   |                                    |     |     |                   |        |
| cerebellum (lobule VIII)                                   |                                   |                                   | n/a                                | 30  | -46 | -52               | 0.1984 |
| <i>cluster 4: right hemisphere</i>                         | 810                               |                                   |                                    |     |     |                   |        |
| middle frontal gyrus                                       |                                   |                                   | 6                                  | 33  | 2   | 62                | 0.2032 |

|                                    |     |     |     |     |    |        |
|------------------------------------|-----|-----|-----|-----|----|--------|
| <i>cluster 5: right hemisphere</i> | 378 |     |     |     |    |        |
| postcentral gyrus                  |     | 4   | 54  | -19 | 47 | 0.1922 |
| <i>cluster 6: right hemisphere</i> | 108 |     |     |     |    |        |
| occipital pole                     |     | n/a | 3   | -94 | 14 | 0.1802 |
| <i>cluster 7: left hemisphere</i>  | 54  |     |     |     |    |        |
| thalamus                           |     | n/a | -12 | -16 | 5  | 0.178  |
| <i>cluster 8: right hemisphere</i> | 27  |     |     |     |    |        |
| occipital pole                     |     | n/a | 3   | -91 | 29 | 0.1733 |
| <i>cluster 9: right hemisphere</i> | 27  |     |     |     |    |        |
| postcentral gyrus                  |     | 2   | 48  | -31 | 53 | 0.1734 |

---

*Note.* Negative loadings: no negative loadings passed threshold
