# Supplementary material for: Multiple Functional Brain Networks Related to Pain Perception Revealed by fMRI
Source: PubMed Central journal article supplement (PMC9537130; doi:10.1007/s12021-021-09527-6), 2021-06-08
Supplement: 12021_2021_9527_MOESM3_ESM.pdf [file 12021_2021_9527_MOESM3_ESM.pdf]

Supplementary Table 2

*Anatomical Descriptions for the Top 10% of Component 2 Loadings*

| Brain Regions (Harvard-Oxford Atlas)        | Cluster Volume (mm <sup>3</sup> ) | Brodmann's Area for Peak Location | MNI Coordinates for Peak Locations |     |     | Component Loading |        |
|---------------------------------------------|-----------------------------------|-----------------------------------|------------------------------------|-----|-----|-------------------|--------|
|                                             |                                   |                                   | x                                  | y   | z   |                   |        |
| positive loadings                           |                                   |                                   |                                    |     |     |                   |        |
| <i>cluster 1: right hemisphere</i>          | 64017                             |                                   |                                    |     |     |                   |        |
| temporal pole                               |                                   |                                   | 38                                 | 57  | 14  | -7                | 0.2149 |
| frontal pole                                |                                   |                                   | 46                                 | 42  | 47  | 2                 | 0.1894 |
| central opercular cortex                    |                                   |                                   | 22                                 | 63  | -19 | 17                | 0.1745 |
| frontal pole                                |                                   |                                   | 45                                 | 39  | 47  | 17                | 0.1445 |
| supramarginal gyrus, anterior division      |                                   |                                   | 2                                  | 57  | -28 | 44                | 0.14   |
| heschl's gurs (includes H1 and H2)          |                                   |                                   | 48                                 | 57  | -10 | 5                 | 0.1398 |
| supramarginal gyrus, anterior division      |                                   |                                   | 40                                 | 54  | -34 | 47                | 0.1365 |
| middle frontal gyrus                        |                                   |                                   | n/a                                | 48  | 8   | 44                | 0.1359 |
| supramarginal gyrus, posterior division     |                                   |                                   | 40                                 | 51  | -40 | 44                | 0.135  |
| inferior frontal gyrus, pars opercularis    |                                   |                                   | 44                                 | 54  | 17  | 29                | 0.133  |
| middle frontal gyrus                        |                                   |                                   | 6                                  | 45  | 5   | 47                | 0.1323 |
| putamen                                     |                                   |                                   | 48                                 | 33  | -13 | -4                | 0.1314 |
| middle frontal gyrus                        |                                   |                                   | 45                                 | 51  | 32  | 20                | 0.1281 |
| insular cortex (posterior)                  |                                   |                                   | 48                                 | 36  | -13 | 11                | 0.1265 |
| inferior frontal gyrus, pars opercularis    |                                   |                                   | 48                                 | 54  | 20  | 17                | 0.1253 |
| insular cortex (posterior)                  |                                   |                                   | 48                                 | 39  | -10 | -10               | 0.1179 |
| putamen                                     |                                   |                                   | 34                                 | 30  | -1  | -7                | 0.1082 |
| pallidum                                    |                                   |                                   | n/a                                | 27  | -4  | -1                | 0.106  |
| lateral occipital cortex, superior division |                                   |                                   | 7                                  | 36  | -64 | 44                | 0.099  |
| insular cortex (anterior)                   |                                   |                                   | 48                                 | 33  | 5   | 5                 | 0.0989 |
| insular cortex (anterior)                   |                                   |                                   | 47                                 | 33  | 26  | -1                | 0.0955 |
| <i>cluster 2: bilateral</i>                 | 45765                             |                                   |                                    |     |     |                   |        |
| cerebellum (crus 1)                         |                                   |                                   | n/a                                | -30 | -64 | -31               | 0.1668 |
| intracalcarine cortex                       |                                   |                                   | 17                                 | 0   | -76 | 8                 | 0.154  |
| cerebellum (crus 1)                         |                                   |                                   | n/a                                | -12 | -73 | -31               | 0.1345 |
| precuneous cortex                           |                                   |                                   | 7                                  | -9  | -70 | 38                | 0.1262 |
| cerebellum (lobule VI)                      |                                   |                                   | 37                                 | -27 | -43 | -31               | 0.1239 |
| n/a                                         |                                   |                                   | n/a                                | -21 | -40 | -31               | 0.1222 |
| cuneal cortex                               |                                   |                                   | 18                                 | 3   | -79 | 29                | 0.1199 |
| lingual gyrus                               |                                   |                                   | 18                                 | -12 | -58 | -16               | 0.1151 |
| cerebellum (lobule IV)                      |                                   |                                   | 18                                 | -9  | -55 | -13               | 0.1145 |
| lingual gyrus                               |                                   |                                   | 18                                 | 9   | -70 | 35                | 0.1108 |
| n/a                                         |                                   |                                   | n/a                                | 0   | -49 | -22               | 0.1097 |
| precuneous cortex                           |                                   |                                   | 7                                  | 12  | -70 | 41                | 0.1088 |
| intracalcarine cortex                       |                                   |                                   | 18                                 | 12  | -67 | 32                | 0.108  |
| cerebellum (lobule VIII)                    |                                   |                                   | n/a                                | -24 | -61 | -40               | 0.1076 |
| n/a                                         |                                   |                                   | 27                                 | 6   | -34 | -34               | 0.1024 |
| lingual gyrus                               |                                   |                                   | 18                                 | -15 | -55 | -28               | 0.1016 |
| cerebellum (lobule VIII)                    |                                   |                                   | n/a                                | -21 | -67 | -40               | 0.1015 |
| n/a                                         |                                   |                                   | n/a                                | -12 | -58 | -34               | 0.1015 |
| vermis                                      |                                   |                                   | n/a                                | 0   | -55 | -34               | 0.0972 |
| <i>cluster 3: left hemisphere</i>           | 39636                             |                                   |                                    |     |     |                   |        |
| temporal pole                               |                                   |                                   | n/a                                | -48 | 14  | -10               | 0.17   |
| inferior frontal gyrus, pars opercularis    |                                   |                                   | 48                                 | -57 | 11  | -1                | 0.1514 |
| central opercular cortex                    |                                   |                                   | 48                                 | -57 | 2   | 2                 | 0.151  |

|                                              |       |     |     |     |     |        |
|----------------------------------------------|-------|-----|-----|-----|-----|--------|
| parietal operculum cortex                    |       | 42  | -57 | -31 | 20  | 0.1378 |
| insular cortex (anterior)                    |       | 48  | -36 | 14  | 2   | 0.1315 |
| supramarginal gyrus, anterior division       |       | 40  | -57 | -37 | 38  | 0.1253 |
| middle temporal gyrus, temporooccipital part |       | 21  | -45 | -46 | 47  | 0.1236 |
| frontal orbital cortex                       |       | 47  | -33 | 26  | -7  | 0.1234 |
| n/a                                          |       | 37  | -39 | -49 | 44  | 0.1217 |
| insular cortex (posterior)                   |       | 48  | -39 | -10 | -10 | 0.1211 |
| angular gyrus                                |       | 7   | -33 | -58 | 38  | 0.1209 |
| supramarginal gyrus, posterior division      |       | 40  | -36 | -46 | 41  | 0.1192 |
| inferior frontal gyrs                        |       | 44  | -45 | 11  | 29  | 0.109  |
| insular cortex (posterior)                   |       | 48  | -33 | -19 | 2   | 0.1056 |
| <i>cluster 4: bilateral</i>                  | 29781 |     |     |     |     |        |
| paracingulate gyrus                          |       | n/a | 0   | 26  | 38  | 0.1846 |
| superior frontal gyrus                       |       | 6   | 3   | 14  | 59  | 0.1686 |
| superior frontal gyrus                       |       | 6   | -15 | 11  | 59  | 0.0956 |
| <i>cluster 5: left hemisphere</i>            | 13608 |     |     |     |     |        |
| frontal pole                                 |       | 47  | -39 | 44  | -1  | 0.1578 |
| frontal pole                                 |       | 10  | -30 | 53  | 8   | 0.1357 |
| <i>cluster 6: bilateral</i>                  | 13122 |     |     |     |     |        |
| n/a                                          |       | n/a | 12  | 2   | 8   | 0.149  |
| n/a                                          |       | n/a | -12 | 5   | 8   | 0.1426 |
| thalamus                                     |       | n/a | 12  | -10 | 5   | 0.13   |
| n/a                                          |       | n/a | -6  | -19 | -7  | 0.1    |
| n/a                                          |       | n/a | -9  | -16 | -4  | 0.0977 |
| n/a                                          |       | n/a | 9   | -16 | -7  | 0.0973 |
| <i>cluster 7: right hemisphere</i>           | 3726  |     |     |     |     |        |
| cerebellum (lobule VI)                       |       | n/a | 30  | -58 | -31 | 0.1465 |
| <i>cluster 8: left hemisphere</i>            | 2052  |     |     |     |     |        |
| cingulate gyrus, posterior division          |       | n/a | -3  | -28 | 23  | 0.1355 |
| <i>cluster 9: left hemisphere</i>            | 1053  |     |     |     |     |        |
| middle frontal gyrus                         |       | 8   | -27 | 11  | 53  | 0.1066 |
| middle frontal gyrus                         |       | 6   | -33 | 2   | 44  | 0.1016 |
| <i>cluster 10: right hemisphere</i>          | 783   |     |     |     |     |        |
| postcentral gyrus                            |       | 3   | 24  | -37 | 65  | 0.1116 |
| <i>cluster 11: right hemisphere</i>          | 297   |     |     |     |     |        |
| n/a                                          |       | n/a | 12  | -58 | -34 | 0.1045 |
| <i>cluster 12: left hemisphere</i>           | 297   |     |     |     |     |        |
| precentral gyrus                             |       | 48  | -39 | -13 | 32  | 0.1028 |
| <i>cluster 13: left hemisphere</i>           | 135   |     |     |     |     |        |
| insular cortex (posterior)                   |       | 48  | -36 | -16 | 14  | 0.1034 |
| <i>cluster 14: right hemisphere</i>          | 135   |     |     |     |     |        |
| precentral gyrus                             |       | 6   | 21  | -25 | 56  | 0.0978 |
| <i>cluster 15: left hemisphere</i>           | 108   |     |     |     |     |        |
| frontal orbital cortex                       |       | 48  | -24 | 8   | -10 | 0.0987 |
| <i>cluster 16: right hemisphere</i>          | 54    |     |     |     |     |        |
| n/a                                          |       | n/a | 9   | -73 | -31 | 0.0936 |
| <i>cluster 17: right hemisphere</i>          | 54    |     |     |     |     |        |
| n/a                                          |       | n/a | 12  | -37 | -31 | 0.0942 |
| <i>cluster 18: right hemisphere</i>          | 54    |     |     |     |     |        |
| insular cortex (anterior)                    |       | 47  | 33  | 20  | 2   | 0.0972 |
| <i>cluster 19: right hemisphere</i>          | 54    |     |     |     |     |        |
| precentral gyrus                             |       | n/a | 39  | -10 | 35  | 0.0986 |

Note. Negative loadings: no negative loadings passed threshold
