# Supplementary material for: Multiple Functional Brain Networks Related to Pain Perception Revealed by fMRI
Source: PubMed Central journal article supplement (PMC9537130; doi:10.1007/s12021-021-09527-6), 2021-06-08
Supplement: 12021_2021_9527_MOESM5_ESM.pdf [file 12021_2021_9527_MOESM5_ESM.pdf]

Supplementary Table 4

*Descriptive Statistics for Pain Rating and Network Activation Data, by Temperature Category*

| <i>Variable</i> | <i>High Temperatures</i> |             | <i>Low Temperatures</i> |             |
|-----------------|--------------------------|-------------|-------------------------|-------------|
|                 | <i>Mean</i>              | <i>S.E.</i> | <i>Mean</i>             | <i>S.E.</i> |
| Pain Rating     | 118.83                   | 5.06        | 61.16                   | 5.82        |
| Component 1     | -0.17                    | 0.01        | -0.22                   | 0.01        |
| Component 2     | 0.11                     | 0.02        | 0.02                    | 0.02        |
| Component 4     | 0                        | 0.02        | -0.04                   | 0.03        |

*Note.* Pain ratings are given on a 200-point VAS scale, Component activations are given by FIR-based predictor weights outputted by fMRI-CPCA (see section 2.6.). S.E. = standard error of the mean.
