# Supplementary material for: Multiple Functional Brain Networks Related to Pain Perception Revealed by fMRI
Source: Springer Nature journal article supplement (doi:10.1007/s12021-021-09527-6), 2021-06-08
Supplement: MOESM4 [file 25778584]

Supplementary Table 3

*Anatomical Descriptions for the Top 10% of Component 4 Loadings*

| Brain Regions (Harvard-Oxford Atlas)         | Cluster Volume (mm <sup>3</sup> ) | Brodmann's Area for Peak Location | MNI Coordinates for Peak Locations |     |     | Component Loading |         |
|----------------------------------------------|-----------------------------------|-----------------------------------|------------------------------------|-----|-----|-------------------|---------|
|                                              |                                   |                                   | x                                  | y   | z   |                   |         |
| positive loadings                            |                                   |                                   |                                    |     |     |                   |         |
| <i>cluster 1: right hemisphere</i>           | 162                               |                                   |                                    |     |     |                   |         |
| frontal pole                                 |                                   |                                   | 46                                 | 48  | 47  | -1                | 0.0693  |
| negative loadings                            |                                   |                                   |                                    |     |     |                   |         |
| <i>cluster 1: bilateral</i>                  | 102870                            |                                   |                                    |     |     |                   |         |
| cingulate gyrus, posterior division          |                                   |                                   | 23                                 | -3  | -55 | 26                | -0.142  |
| cingulate gyrus, posterior division          |                                   |                                   | n/a                                | 0   | -46 | 23                | -0.1409 |
| cingulate gyrus, posterior division          |                                   |                                   | 27                                 | -9  | -43 | 2                 | -0.1242 |
| cingulate gyrus, posterior division          |                                   |                                   | n/a                                | -6  | -46 | 5                 | -0.1236 |
| precuneous cortex                            |                                   |                                   | n/a                                | 0   | -43 | 56                | -0.1141 |
| parahippocampal gyrus, anterior division     |                                   |                                   | 30                                 | -24 | -19 | -19               | -0.1132 |
| postcentral gyrus                            |                                   |                                   | 5                                  | 12  | -43 | 62                | -0.1115 |
| precentral gyrus                             |                                   |                                   | n/a                                | -3  | -31 | 50                | -0.108  |
| precentral gyrus                             |                                   |                                   | n/a                                | 0   | -31 | 62                | -0.1076 |
| superior parietal lobule                     |                                   |                                   | 2                                  | 24  | -40 | 59                | -0.1033 |
| cingulate gyrus, posterior division          |                                   |                                   | 27                                 | 12  | -43 | -1                | -0.1023 |
| parahippocampal gyrus, posterior division    |                                   |                                   | 30                                 | -24 | -37 | -16               | -0.0994 |
| precentral gyrus                             |                                   |                                   | 4                                  | 9   | -31 | 71                | -0.0976 |
| precentral gyrus                             |                                   |                                   | 4                                  | -6  | -28 | 71                | -0.0968 |
| precentral gyrus                             |                                   |                                   | n/a                                | 0   | -22 | 53                | -0.0941 |
| temporal fusiform cortex, posterior division |                                   |                                   | 20                                 | -30 | -31 | -22               | -0.094  |
| lingual gyrus                                |                                   |                                   | 30                                 | -18 | -43 | -13               | -0.0936 |
| postcentral gyrus                            |                                   |                                   | n/a                                | -12 | -40 | 56                | -0.0923 |
| postcentral gyrus                            |                                   |                                   | 3                                  | 36  | -28 | 56                | -0.0922 |
| juxtapositional lobule cortex                |                                   |                                   | n/a                                | 3   | -4  | 77                | -0.0895 |
| precentral gyrus                             |                                   |                                   | 6                                  | 45  | -10 | 56                | -0.0887 |
| precentral gyrus                             |                                   |                                   | 6                                  | 6   | -16 | 80                | -0.0819 |
| precentral gyrus                             |                                   |                                   | 6                                  | 36  | -13 | 65                | -0.0816 |
| precentral gyrus                             |                                   |                                   | 6                                  | 21  | -19 | 71                | -0.0816 |
| cingulate gyrus, posterior division          |                                   |                                   | 23                                 | -3  | -16 | 38                | -0.0786 |
| precuneous cortex                            |                                   |                                   | 7                                  | 6   | -76 | 38                | -0.0774 |
| temporal occipital fusiform cortex           |                                   |                                   | 37                                 | -27 | -52 | -13               | -0.0769 |
| postcentral gyrus                            |                                   |                                   | 4                                  | 39  | -19 | 47                | -0.0757 |
| temporal fusiform cortex, posterior division |                                   |                                   | 37                                 | -42 | -40 | -28               | -0.0751 |
| cuneal cortex                                |                                   |                                   | 18                                 | 12  | -79 | 32                | -0.0748 |
| hippocampus                                  |                                   |                                   | 37                                 | 27  | -31 | -4                | -0.073  |
| postcentral gyrus                            |                                   |                                   | 6                                  | -24 | -28 | 65                | -0.0715 |
| hippocampus                                  |                                   |                                   | 37                                 | 24  | -34 | -1                | -0.0714 |
| postcentral gyrus                            |                                   |                                   | 4                                  | -18 | -31 | 65                | -0.0705 |
| cuneal cortex                                |                                   |                                   | 18                                 | -6  | -79 | 26                | -0.0694 |
| superior frontal gyrus                       |                                   |                                   | 6                                  | -9  | -1  | 71                | -0.0691 |

|                                              |       |     |     |     |     |         |
|----------------------------------------------|-------|-----|-----|-----|-----|---------|
| cingulate gyrus, anterior division           |       | 24  | 0   | -1  | 35  | -0.0677 |
| n/a                                          |       | 27  | 18  | -31 | -1  | -0.0659 |
| <i>cluster 2: bilateral</i>                  | 41526 |     |     |     |     |         |
| frontal pole                                 |       | 10  | 3   | 59  | 2   | -0.137  |
| frontal pole                                 |       | 10  | -15 | 62  | 20  | -0.1002 |
| frontal orbital cortex                       |       | 47  | -27 | 32  | 41  | -0.0933 |
| frontal pole                                 |       | 9   | -21 | 50  | 29  | -0.0907 |
| frontal pole                                 |       | 9   | -18 | 47  | 38  | -0.0883 |
| frontal pole                                 |       | 10  | 12  | 62  | 23  | -0.0869 |
| frontal pole                                 |       | 9   | -15 | 44  | 41  | -0.085  |
| <i>cluster 3: left hemisphere</i>            | 39501 |     |     |     |     |         |
| lateral occipital cortex, superior division  |       | 39  | -48 | -64 | 23  | -0.142  |
| middle temporal gyrus, posterior division    |       | 20  | -57 | -10 | -16 | -0.1384 |
| angular gyrus                                |       | 37  | -54 | -58 | 14  | -0.1301 |
| middle temporal gyrus, anterior division     |       | 21  | -57 | -1  | -25 | -0.1167 |
| superior temporal gyrus, posterior division  |       | 22  | -60 | -40 | 8   | -0.1024 |
| middle temporal gyrus, posterior division    |       | 21  | -66 | -19 | -10 | -0.0944 |
| temporal pole                                |       | 38  | -51 | 17  | -28 | -0.0867 |
| temporal pole                                |       | 38  | -54 | 17  | -22 | -0.0842 |
| temporal pole                                |       | n/a | -39 | 2   | -46 | -0.0799 |
| planum temporale                             |       | 41  | -45 | -37 | 8   | -0.0753 |
| superior temporal gyrus, posterior division  |       | 21  | -48 | -40 | 5   | -0.0728 |
| frontal orbital cortex                       |       | 38  | -42 | 29  | -19 | -0.0727 |
| planum temporale                             |       | 22  | -54 | -25 | 2   | -0.0707 |
| temporal pole                                |       | 38  | -33 | 26  | -28 | -0.0705 |
| planum temporale                             |       | 48  | -48 | -25 | 2   | -0.0703 |
| <i>cluster 4: right hemisphere</i>           | 14931 |     |     |     |     |         |
| angular gyrus                                |       | 39  | 45  | -55 | 23  | -0.121  |
| supramarginal gyurs, posterior division      |       | 41  | 48  | -37 | 11  | -0.093  |
| superior temporal gyrus, posterior division  |       | 21  | 51  | -31 | -1  | -0.0747 |
| heschle's gyrus (includes H1 and H2)         |       | 48  | 36  | -25 | 14  | -0.0702 |
| <i>cluster 5: right hemisphere</i>           | 6912  |     |     |     |     |         |
| middle temporal gyrus, anterior division     |       | 21  | 60  | -4  | -19 | -0.102  |
| temporal gyrus                               |       | 21  | 57  | 5   | -25 | -0.0855 |
| temporal pole                                |       | 21  | 54  | 5   | -31 | -0.0844 |
| inferior temporal gyrus, anterior division   |       | n/a | 57  | -4  | -37 | -0.0773 |
| <i>cluster 6: right hemisphere</i>           | 2700  |     |     |     |     |         |
| parahippocampal gyrus, anterior division     |       | 20  | 27  | -19 | -19 | -0.1039 |
| temporal fusiform cortex, posterior division |       | 20  | 30  | -31 | -22 | -0.0761 |
| temporal occipital fusiform cortex           |       | 37  | 42  | -40 | -28 | -0.0703 |
| temporal occipital fusiform cortex           |       | 37  | 42  | -46 | -25 | -0.0699 |
| <i>cluster 7: right hemisphere</i>           | 1539  |     |     |     |     |         |
| cerebellum (crus 2)                          |       | n/a | 27  | -76 | -37 | -0.0851 |
| <i>cluster 8: left hemisphere</i>            | 972   |     |     |     |     |         |
| postcentral gyrus                            |       | 4   | -45 | -13 | 32  | -0.0768 |
| postcentral gyrus                            |       | 3   | -54 | -13 | 35  | -0.0714 |
| <i>cluster 9: left hemisphere</i>            | 783   |     |     |     |     |         |
| subcallosal cortex                           |       | 25  | -3  | 17  | -13 | -0.0832 |
| <i>cluster 10: right hemisphere</i>          | 648   |     |     |     |     |         |
| frontal pole                                 |       | 9   | 21  | 38  | 47  | -0.0777 |

|                                             |     |     |     |     |     |         |
|---------------------------------------------|-----|-----|-----|-----|-----|---------|
| superior frontal gyrus                      |     | 9   | 21  | 29  | 41  | -0.0701 |
| <i>cluster 11: right hemisphere</i>         | 513 |     |     |     |     |         |
| cerebellum (lobule IX)                      |     | n/a | 9   | -49 | -46 | -0.0848 |
| <i>cluster 12: right hemisphere</i>         | 405 |     |     |     |     |         |
| temporal pole                               |     | 38  | 33  | 26  | -31 | -0.0725 |
| temporal pole                               |     | n/a | 24  | 23  | -34 | -0.0702 |
| <i>cluster 13: left hemisphere</i>          | 351 |     |     |     |     |         |
| cerebellum (crus 2)                         |     | n/a | -24 | -76 | -34 | -0.0788 |
| <i>cluster 14: left hemisphere</i>          | 216 |     |     |     |     |         |
| insular cortex                              |     | 48  | -36 | -10 | 11  | -0.0717 |
| <i>cluster 15: right hemisphere</i>         | 108 |     |     |     |     |         |
| middle temporal gyrus, posterior division   |     | 21  | 69  | -31 | -7  | -0.0693 |
| <i>cluster 16: left hemisphere</i>          | 108 |     |     |     |     |         |
| parietal operculum cortex                   |     | 48  | -39 | -31 | 17  | -0.0678 |
| <i>cluster 17: right hemisphere</i>         | 108 |     |     |     |     |         |
| postcentral gyrus                           |     | 3   | 54  | -10 | 32  | -0.0661 |
| <i>cluster 18: left hemisphere</i>          | 81  |     |     |     |     |         |
| cerebellum (lobule IX)                      |     | n/a | -6  | -52 | -46 | -0.0693 |
| <i>cluster 19: right hemisphere</i>         | 81  |     |     |     |     |         |
| frontal orbital cortex                      |     | 47  | 39  | 32  | -19 | -0.0674 |
| <i>cluster 20: right hemisphere</i>         | 81  |     |     |     |     |         |
| lingual gyrus                               |     | 19  | 21  | -58 | -7  | -0.0656 |
| <i>cluster 21: right hemisphere</i>         | 81  |     |     |     |     |         |
| lateral occipital cortex, superior division |     | 7   | 21  | -70 | 41  | -0.071  |
| <i>cluster 22: left hemisphere</i>          | 27  |     |     |     |     |         |
| temporal pole                               |     | 36  | -30 | 2   | -28 | -0.0658 |
| <i>cluster 23: right hemisphere</i>         | 27  |     |     |     |     |         |
| central opercular cortex                    |     | 48  | 63  | -4  | 11  | -0.0649 |

---
